# Supplementary material for: Metabolic Dysfunction Associated Liver Disease in Patients Undergoing Coronary Computed Tomography Angiography
Source: MDPI journal article supplement (doi:10.3390/jcdd11030077), 2024-02-26
Supplement: s1 [file s1]

# **Metabolic dysfunction associated steatotic liver disease in patients undergoing coronary computed tomography angiography**

Rares Ilie Orzan<sup>1,2,\*</sup>, Rares Ioan Gligor<sup>1</sup>, Renata Agoston<sup>3</sup>, Carmen Cionca<sup>1,4</sup>, Alexandru Zlibut<sup>1</sup>, Raluca Pais<sup>5</sup>, Andrada Seicean<sup>1,2</sup>, Lucia Agoston-Coldea<sup>1,4,6</sup>

<sup>1</sup>Department of Internal Medicine, Iuliu Hațieganu University of Medicine and Pharmacy, 400347 Cluj-Napoca, Romania.

<sup>2</sup>Regional Institute of Gastroenterology and Hepatology, Prof. Dr. Octavian Fodor, 400162 Cluj-Napoca, Romania.

<sup>3</sup>Faculty of Medicine, Iuliu Hațieganu University of Medicine and Pharmacy, 400347 Cluj-Napoca, Romania.

<sup>4</sup>Department of Radiology, Affidea Hiperdia Diagnostic Imaging Centre, 400487 Cluj-Napoca, Romania.

<sup>5</sup>Institut de Cardiométabolisme et Nutrition, Hôpital Pitié Salpêtrière, Assistance Publique Hôpitaux de Paris, 75013 Paris, France.

<sup>6</sup>Department of Internal Medicine, Emergency County Hospital, 400347 Cluj-Napoca, Romania.

## **\*) Corresponding author**

Iuliu Hațieganu University of Medicine and Pharmacy

E-mail: [orzanrares@gmail.com](mailto:orzanrares@gmail.com)

## **Table of Contents**

|                  |   |
|------------------|---|
| Table S1 .....   | 2 |
| Equation S1..... | 3 |

## 1. Tables

**Table S1.** Baseline characteristics of patients in study grouped by metabolic syndrome (MetS) status

|                                                     | All patients<br>n=2038 | MetS -<br>n=1113 | MetS+<br>n=925   | p-<br>Value |
|-----------------------------------------------------|------------------------|------------------|------------------|-------------|
| <b>Demographics characteristics</b>                 |                        |                  |                  |             |
| - Age, years                                        | 57.2 (10.7)            | 56.7 (11.1)      | 57.8 (10.1)      | NS          |
| - Male gender, n (%)                                | 1060 (52.0)            | 578 (51.9)       | 482 (52.1)       | NS          |
| - Body-mass index, kg/m <sup>2</sup>                | 28.7 (5.5)             | 23.6 (3.5)       | 34.8 (4.2)       | <0.001      |
| - Systolic blood pressure, mmHg                     | 137.4 (20.1)           | 132.1 (20.4)     | 143.8 (22.1)     | <0.001      |
| - Diastolic blood pressure, mmHg                    | 82.0 (12.1)            | 79.3 (11.9)      | 85.2 (12.5)      | <0.001      |
| - ASCVD (%)                                         | 7.1 (2.7-15.0)         | 4.2 (1.9-8.4)    | 11.3 (4.9-21.5)  | <0.001      |
| <b>CAD risk factors, n (%)</b>                      |                        |                  |                  |             |
| - Hypertension, n (%)                               | 1295 (63.9)            | 667 (59.9)       | 628 (67.9)       | <0.001      |
| - Diabetes mellitus, n (%)                          | 298 (14.6)             | 112 (10.1)       | 186 (20.1)       | <0.001      |
| - Dyslipidemia, n (%)                               | 1127 (55.3)            | 466 (41.9)       | 661 (71.5)       | <0.001      |
| - Smoking, n (%)                                    | 779 (38.2)             | 275 (24.7)       | 504 (54.5)       | <0.001      |
| - Obesity, n (%)                                    | 1009 (49.5)            | 84 (7.5)         | 925 (100)        | <0.001      |
| <b>Biomarker levels, mean (SD)</b>                  |                        |                  |                  |             |
| - Fasting plasma glucose, mg/dl                     | 108.7 (32.4)           | 104.2 (28.4)     | 114.0 (36.7)     | <0.001      |
| - LDL-Cholesterol, mg/dl                            | 123.4 (42.5)           | 122.6 (43.2)     | 124.4 (41.5)     | NS          |
| - HDL-Cholesterol, mg/dl                            | 45.9 (14.7)            | 47.1 (14.7)      | 44.5 (14.6)      | <0.001      |
| - Triglyceridemia, mg/dl                            | 166.1 (28.9)           | 148.9 (28.8)     | 186.7 (29.3)     | <0.001      |
| - eGFR, ml/min/1.73 m <sup>2</sup>                  | 90.2 (23.2)            | 92.3 (23.2)      | 87.7 (22.9)      | NS          |
| <b>Medications, n (%)</b>                           |                        |                  |                  |             |
| - Beta-blockers, n (%)                              | 1515 (74.4)            | 821 (73.8)       | 694 (75.0)       | NS          |
| - ACEIs or ARBs, n (%)                              | 978 (48.0)             | 413 (37.1)       | 565 (61.0)       | <0.001      |
| - Calcium channel blockers, n (%)                   | 401 (19.7)             | 221 (19.8)       | 180 (19.4)       | NS          |
| - Statins, n (%)                                    | 928 (45.5)             | 422 (37.9)       | 506 (54.7)       | <0.001      |
| - Antiplatelet therapy, n (%)                       | 425 (20.8)             | 176 (15.8)       | 249 (26.9)       | <0.01       |
| - Diuretics, n (%)                                  | 520 (25.5)             | 289 (25.9)       | 231 (24.9)       | NS          |
| <b>Coronary Computer Tomographic Angiography</b>    |                        |                  |                  |             |
| - CCS, median (25 <sup>th</sup> –75 <sup>th</sup> ) | 4.6 (0-109.7)          | 3.3 (0.0-105.1)  | 10.5 (0.0-136.7) | <0.001      |
| - Group CCS                                         |                        |                  |                  |             |
| 0                                                   | 805 (39.5)             | 504 (45.3)       | 301 (32.6)       | <0.001      |
| 1-99                                                | 543 (26.6)             | 282 (25.3)       | 261 (28.2)       | NS          |
| 100-399                                             | 324 (15.9)             | 159 (14.3)       | 165 (17.8)       | 0.03        |
| 400-999                                             | 286 (14.1)             | 154 (13.8)       | 132 (14.3)       | NS          |
| >1000                                               | 80 (3.9)               | 14 (1.3)         | 66 (7.1)         | <0.001      |
| - NoP                                               |                        |                  |                  |             |
| 0                                                   | 776 (38.1)             | 422 (37.9)       | 354 (38.3)       | NS          |
| 1-5                                                 | 514 (25.2)             | 269 (24.2)       | 245 (26.5)       | NS          |
| 6-10                                                | 692 (34.0)             | 400 (35.9)       | 292 (31.6)       | 0.05        |
| >10                                                 | 56 (2.7)               | 22 (2.0)         | 34 (3.6)         | 0.05        |
| - EFV, ml                                           | 64.1 (20.4)            | 62.3 (19.5)      | 66.3 (20.9)      | <0.001      |
| - Liver attenuation, UH                             | 63.3 (7.7)             | 65.4 (7.9)       | 60.7 (7.3)       | <0.001      |
| - MASLD                                             | 498 (24.4)             | 187 (16.8)       | 311 (33.6)       | <0.001      |

**Abbreviations:** n, number of patients; IQR, *interquartile range*; eGFR, estimated glomerular filtration rate; ACEI, angiotensin converting enzyme inhibitor; ARB, angiotensin receptor blocker; ASA, acetylsalicylic acid; CAD, coronary artery disease; CCS, coronary calcium score; EFV, epicardial fat volume; HDL-C, high-density lipoprotein cholesterol; LDL-C, low-density lipoprotein cholesterol; LVEDV, left ventricular end-diastolic volume; LVESV, left ventricular end-systolic volume; LVM, left ventricular mass; LVEF, left ventricular ejection fraction; MASLD, metabolic dysfunction associated steatotic liver disease; MetS, metabolic syndrome; NoP, number of calcified plaques.

Values are expressed as n (%), mean +/- standard deviation or median (*interquartile range, 25th-75th*)

**2. Equation S1. CCTA-RS formula.**

$$\mathbf{CCTA - RS = \ln MASLD * (CCS + EFV) * (NoP + 1)}$$

Where MASLD =1.684 if MASLD+, or 1 if MASLD-

CCTA-RS, CCTA-derived risk score; NoP, number of plaques; CCS, coronary calcium score (HU); EFV, epicardial fat volume
